# Supplementary material for: Non-alcoholic fatty liver disease, vascular inflammation and insulin resistance are exacerbated by TRAIL deletion in mice
Source: PubMed Central journal article supplement (PMC5432513; doi:10.1038/s41598-017-01721-4), 2017-05-15
Supplement: 41598_2017_1721_MOESM1_ESM.pdf [file 41598_2017_1721_MOESM1_ESM.pdf]

**Non-alcoholic fatty liver disease, vascular inflammation and insulin resistance  
are exacerbated by TRAIL deletion in mice**

Siân P Cartland<sup>1,2</sup>, Hanis H Harith<sup>3,4</sup>, Scott W Genner<sup>1</sup>, Lei Dang<sup>3</sup>, Victoria C  
Cogger<sup>5,6</sup>, Melissa Vellozzi<sup>1</sup>, Belinda A Di Bartolo<sup>1</sup>, Shane R Thomas<sup>3</sup>, Leon A  
Adams<sup>7</sup>, Mary M Kavurma<sup>1,2\*</sup>.

# Supplemental Figure 1

**a.**

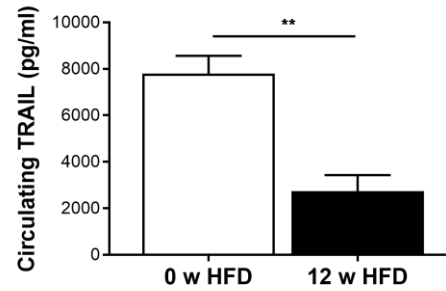

**b.**

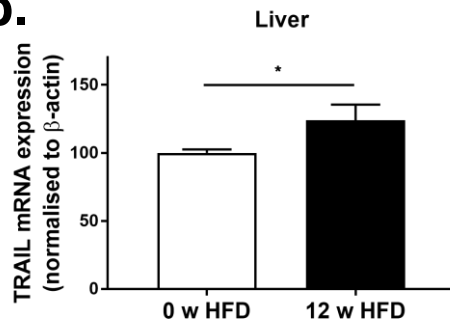

**c.**

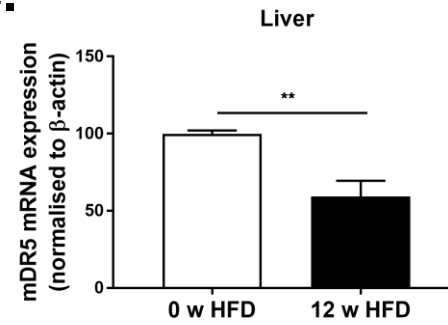

**d.**

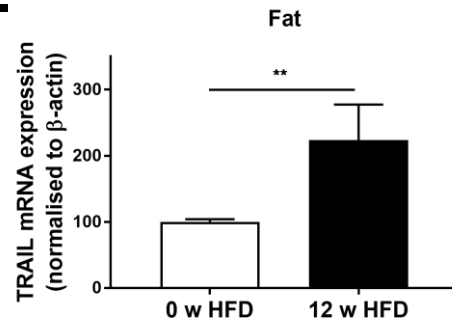

**e.**

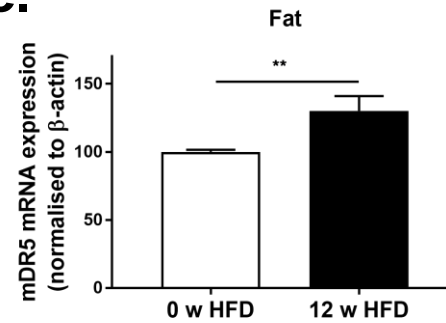

## Supplemental Figure 2

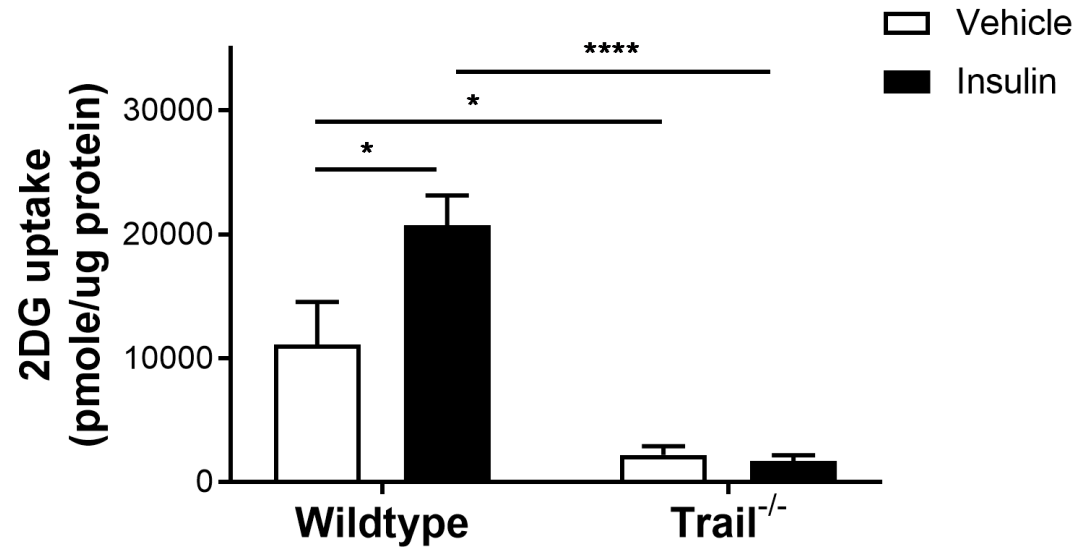

## a. Glucose Tolerance Test

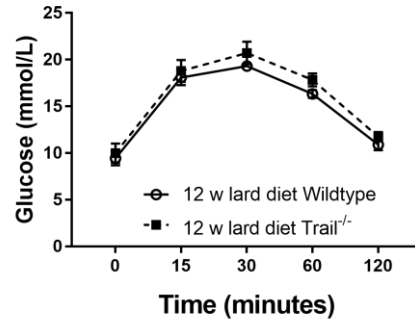

## b. Insulin Tolerance Test

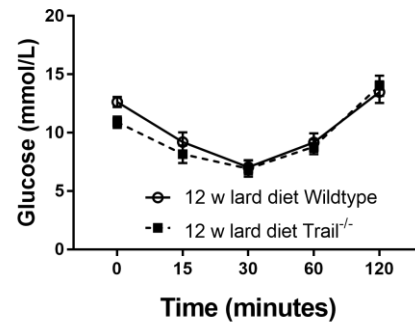

## c.

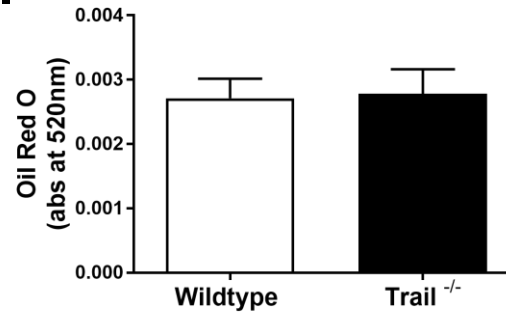

## SUPPLEMENTARY INFORMATION

**Supplemental Figure 1. Wildtype mice have reduced circulating TRAIL, but increased TRAIL expression in peripheral tissues.** **a.** Circulating TRAIL levels are reduced in wildtype mice fed a HFD for 12 (n=6/group). Hepatic **b.** TRAIL and **c.** mDR5 expression. WAT **d.** TRAIL and **e.** mDR5 expression. mRNA levels were normalised to  $\beta$ -actin (n=4-7/group). Results are expressed as mean $\pm$ SEM; Mann Whitney *U* test; \* $p$ <0.05 and \*\* $p$ <0.01.

**Supplemental Figure 2. WAT from *Trail*<sup>-/-</sup> mice have impaired glucose uptake *ex vivo*.** Insulin-inducible and basal glucose uptake is impaired in baseline *Trail*<sup>-/-</sup> WAT compared to wildtype (n=5/group). Results are expressed as mean $\pm$ SEM; ANOVA; \* $p$ <0.05 and \*\*\*\* $p$ <0.0001.

**Supplemental Figure 3. A lard diet has no effect on features of insulin resistance and NAFLD in *Trail*<sup>-/-</sup> mice.** **a.** Glucose and **b.** insulin tolerance tests in 12 w lard *Trail*<sup>-/-</sup> and wildtype mice. **c.** Hepatic tryglyceride content as assessed by oil red O is unchanged. Results are expressed as mean $\pm$ SEM (n=7/genotype).

## TABLES

**Supplemental Table 1: Correlation between plasma TRAIL and clinical, metabolic and biochemical factors in humans with and without NAFLD.**

| <b>Factor</b>                   | <b>Spearman's rho<br/>correlation coefficient</b> | <b><i>P</i> value</b> |
|---------------------------------|---------------------------------------------------|-----------------------|
| <b>Age</b>                      | -0.067                                            | 0.9                   |
| <b>BMI (kg/m<sup>2</sup>)</b>   | -0.174                                            | 0.9                   |
| <b>Waist circumference (cm)</b> | -0.299                                            | 0.9                   |
| <b>Glucose (mmol/l)</b>         | -0.184                                            | 0.9                   |
| <b>Insulin (U/l)</b>            | -0.116                                            | 0.9                   |
| <b>Triglyceride (mmol/l)</b>    | -0.271                                            | 0.9                   |
| <b>HDL-cholesterol (mmol/l)</b> | 0.461                                             | 0.09                  |
| <b>ALT (IU/l)</b>               | -0.516                                            | 0.027                 |
| <b>AST (IU/l)</b>               | -0.458                                            | 0.09                  |

Footnote: *p* value with Bonferroni adjustment presented.

**Supplemental Table 2: Body weights and plasma chemistries between wildtype and *Trail*<sup>-/-</sup> mice**

|                             | <b>0 w HFD</b>  | <b>12 w HFD</b> | <b>12 w HFD</b>                   |
|-----------------------------|-----------------|-----------------|-----------------------------------|
|                             | <b>Wildtype</b> | <b>Wildtype</b> | <b><i>Trail</i><sup>-/-</sup></b> |
| <b>Body weight (g)</b>      | 23.5 ± 0.9      | 33.1 ± 1.3****  | 33.1 ± 1.0                        |
| <b>Glucose (mmol/L)</b>     | 13.4 ± 1.0      | 17.5 ± 0.9**    | 23.3 ± 2.0 <sup>#</sup>           |
| <b>Insulin (pmol/L)</b>     | 48.9 ± 3.6      | 73.2 ± 8.9*     | 103.3 ± 15.6 <sup>#</sup>         |
| <b>Cholesterol (mmol/L)</b> | 1.4 ± 0.1       | 2.0 ± 0.1**     | 2.5 ± 0.2 <sup>#</sup>            |
| <b>Triglycerides (mM)</b>   | 1.4 ± 0.1       | 0.9 ± 0.1*      | 0.6 ± 0.05 <sup>#</sup>           |
| <b>NEFA (mg/dL)</b>         | 0.9 ± 0.1       | 1.1 ± 0.3       | 0.6 ± 0.08                        |

Measurements are from n=6-10/genotype; Results are expressed as mean±SEM, Mann-Whitney *U*-test \**p*<0.05, \*\*0.01, \*\*\*\*0.001 compared to 0 w HFD wildtype; #*p*<0.05 compared to 12 w HFD wildtype.

**Supplemental Table 3: CLAMS data**

| <b>12 w HFD</b>                  | <b>Wildtype</b> | <b><i>Trail</i><sup>-/-</sup></b> |
|----------------------------------|-----------------|-----------------------------------|
| <b>VCO<sub>2</sub> (ml/kg/h)</b> | 92.45 ± 4.758   | 80.99 ± 3.091                     |
| <b>VO<sub>2</sub> (ml/kg/h)</b>  | 109.0 ± 6.578   | 94.48 ± 3.400                     |
| <b>RER</b>                       | 0.8491 ± 0.0145 | 0.8222 ± 0.0121                   |
| <b>XAMB (beam breaks)</b>        | 183.4 ± 27.53   | 278.4 ± 21.200                    |
| <b>ZTOT (beam breaks)</b>        | 81.36 ± 5.762   | 129.0 ± 10.580*                   |
| <b>Food intake (g)</b>           | 3.020 ± 0.132   | 2.782 ± 0.257                     |

Measurements are from n=3-5 mice/genotype. Results are expressed as mean±SEM; Mann-Whitney *U*-test. \**p*<0.05

**Supplemental Table 4: Body weights and plasma chemistries of 12 w lard-fed wildtype and *Trail*<sup>-/-</sup> mice**

|                               | 12 w Lard<br>Wildtype | 12 w Lard<br><i>Trail</i> <sup>-/-</sup> |
|-------------------------------|-----------------------|------------------------------------------|
| <b>Body weight (g)</b>        | 38.81 ± 1.77          | 37.98 ± 1.51                             |
| <b>Glucose (mmol/L)</b>       | 5.95 ± 0.37           | 9.71 ± 1.18*                             |
| <b>Insulin (pmol/L)</b>       | 103.25 ± 21.61        | 191.23 ± 37.18                           |
| <b>Cholesterol (mmol/L)</b>   | 3.06 ± 0.15           | 2.99 ± 0.10                              |
| <b>Triglycerides (mmol/L)</b> | 0.81 ± 0.08           | 0.64 ± 0.05                              |
| <b>NEFA (mmol/L)</b>          | 0.49 ± 0.06           | 0.33 ± 0.04                              |

Measurements are from n=7 mice/genotype. Results are expressed as mean±SEM; Mann-Whitney *U*-test. \*p<0.05 compared to wildtype.

**Supplemental Table 5: Primer sequences.** m denotes murine; h denotes human sequences.

| Gene              | Forward primer (5' to 3') | Reverse primer (5' to 3')  |
|-------------------|---------------------------|----------------------------|
| mTRAIL            | CAGGCTGTGTCTGTGGCTGT      | TGAGAAGCAAGCTAGTCCAATTTTG  |
| mDR5              | GCAGAGAGGGTATTGACTACACC   | GCATCGGGTTTCTACGACTTT      |
| hTRAIL            | ACCAACGAGCTGAAGCAGAT      | CAAGTGCAAGTTGCTCAGGA       |
| hDR4              | CCAACAAGACCTCGCTCCCCAGC   | AAGACTACGGCTGCAACTGTGACTCC |
| hDR5              | GTCCTGCTGCAGGTCGTACC      | GATGTCACTCCAGGGCGTAC       |
| mInsulin-receptor | TTTGTCATGGATGGAGGCTA      | CCTCATCTGGGGTTGAACT        |



|                  |                        |                         |
|------------------|------------------------|-------------------------|
| mIL-1 $\beta$    | GTTTCTGCTTTCACCACTCCA  | GAGTCCAATTTACTCCAGGTCAG |
| mIL-6            | CTGCAAGAGACTTCCATCCAG  | AGTGGTATAGACAGGTCTGTTGG |
| mMCP-1           | GCTGGAGCATCCACGTGTT    | ATCTTGCTGGTGAATGAGTAGCA |
| mTNF- $\alpha$   | CAGGCGGTGCCTATGTCTC    | CGATCACCCCGAAGTTCAGTAG  |
| mVCAM-1          | TTGGGAGCCTCAACGGTACT   | GCAATCGTTTTGTATTCAGGGGA |
| mICAM-1          | GTGATGCTCAGGTATCCATCCA | CACAGTTCTCAAAGCACAGCG   |
| mG6-phosphatase  | CTGTTTGGACAACGCCCGTAT  | AGGTGACAGGGAAGTCTTTA    |
| mPEPCK-1         | AGCATTCAACGCCAGGTTC    | CGAGTCTGTCAGTTCAATACCAA |
| mSREBP-1         | AGCAGCCCCTAGAACAAACAC  | CAGCAGTGAGTCTGCCTTGAT   |
| mHMGCoAR         | AGCTTGCCCGAATTGTATGTG  | TCTGTTGTGAACCATGTGACTTC |
| m $\beta$ -actin | AGCCATGTACGTAGCCATCC   | CTCTCAGCTGTGGTGGTGAA    |
| m18S             | CGGCTACCACATCCAAGGAA   | GCTGGAATTACCGCGGCT      |
| mHPRT            | AGTCCCAGCGTCGTGATTAG   | TTTCCAAATCCTCGGCATAATGA |
| hGAPDH           | GAAGGCTGGGGCTCATTT     | CAGGAGGCATTGCTGATGAT    |
